# Supplementary material for: Synthesis of dimpled polymer–silica nanocomposite particles by interfacial swelling-based seeded polymerization
Source: Royal Society of Chemistry journal article supplement (doi:10.1039/d2sm00810f), 2023-12-08
Supplement: d2sm00810f1.pdf [file d2sm00810f1.pdf]

**Supplementary Information:**  
**Synthesis of dimpled polymer-silica nanocomposite particles by  
interfacial swelling-based seeded polymerization**

Yiping Yin,<sup>‡</sup> Zhe Wang<sup>‡</sup> and Hua Zou<sup>\*</sup>

University of Shanghai for Science and Technology, 516 Jungong Road, Shanghai 200093, China.

E-mail: [hua.zou@usst.edu.cn](mailto:hua.zou@usst.edu.cn).

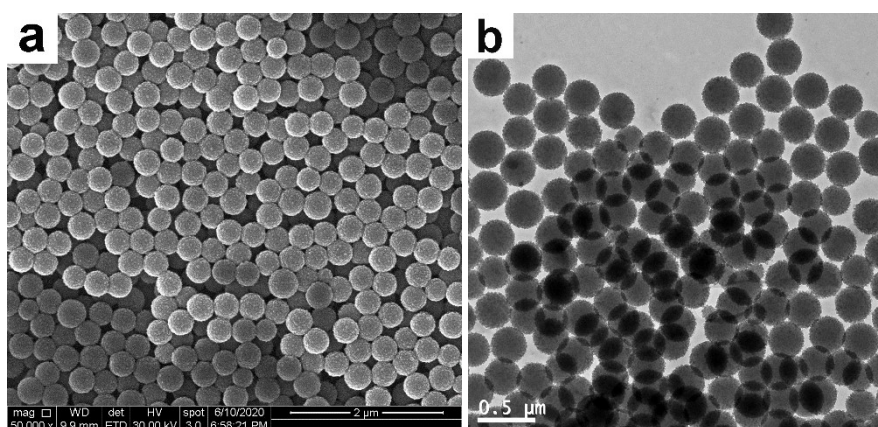

**Fig. S1** Low magnification SEM (a) and TEM (b) images of PS-SiO<sub>2</sub> nanocomposite particles.

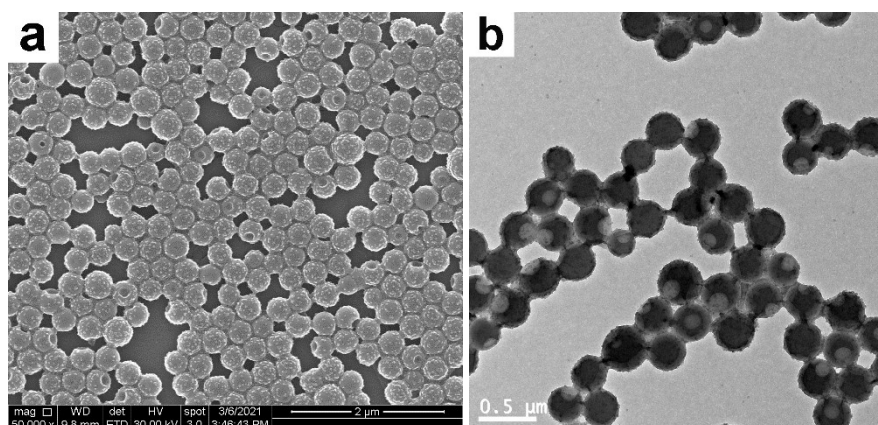

**Fig. S2** Low magnification SEM (a) and TEM (b) images of typical dimpled polymer-SiO<sub>2</sub> nanocomposite particles (entry 2).

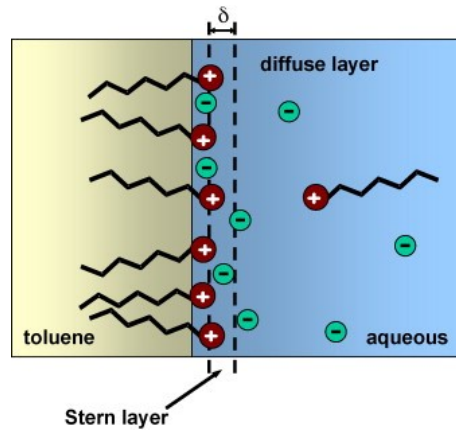

**Fig. S3** Schematic representation of the electrical double layer structure at the toluene-water interface in the presence of CTAB.<sup>62</sup>
